# Supplementary material
Source: ML conference proceedings conference paper supplement (https://proceedings.neurips.cc/paper_files/paper/2020/hash/0baf163c24ed14b515aaf57a9de5501c-Abstract.html)
Supplement: Supplementary file [file 0baf163c24ed14b515aaf57a9de5501c-Supplemental.pdf]

## A Full Proofs

### A.1 Proof for Lemma 1

**Lemma.** Let  $(F, W(\cdot))$  be a given discrete integration instance such that  $W(x_i) = \frac{p_i}{q_i}$  and  $W(x_i) + W(\neg x_i) = 1$  for every  $i$ . Let  $m_i = \lceil \max(\log_2 p_i, \log_2(q_i - p_i)) \rceil$ , and let  $\hat{F} = F \wedge \Omega$ , where  $\Omega = \bigwedge ((x_i \rightarrow \varphi_{p_i, m_i}) \wedge (\neg x_i \rightarrow \varphi_{q_i - p_i, m_i}))$ . Denote  $C_W = \prod_{x_i} q_i$ . Then  $W(F) = \frac{|R_{\hat{F}}|}{C_W}$ .

*Proof.* Note that if  $W(x_i) = p_i/q_i$  then  $W(\neg x_i) = (q_i - p_i)/q_i$ . Let  $W'(\cdot)$  be a new weight function, defined over the literals of  $X$  as follows.  $W'(x_i) = p_i$  and  $W'(\neg x_i) = q_i - p_i$ . Note that  $W'(\cdot)$  is different from the typical weight functions considered in this paper as  $W'(x_i)$  and  $W'(\neg x_i)$  are non negative integers. By extending the definition of  $W'(\cdot)$  in a natural way (as was done for  $W(\cdot)$ ) to assignments, sets of assignments and formulas, it is easy to see that  $W(F) = W'(F)/C_W$ .

Next, for every assignment  $\sigma$  of variables in  $X$ , we have that  $W'(\sigma) = \prod_{i \in \sigma^1} p_i \prod_{i \in \sigma^0} (q_i - p_i)$ . Let  $\hat{\sigma}$  be an assignment of variables appearing in  $\hat{F}$ . We say that  $\hat{\sigma}$  is *compatible* with  $\sigma$  if for all variables  $x_i$  in the original set of variables  $X$ , we have  $\hat{\sigma}(x_i) = \sigma(x_i)$ . Observe that  $\hat{\sigma}$  is compatible with exactly one assignment of variables in  $X$ . For every assignment  $\sigma$  for  $F$ , let  $S_\sigma$  denote the set of all satisfying assignments of  $\hat{F}$  that are compatible with  $\sigma$ . Then  $\{S_\sigma | \sigma \in R_F\}$  is a partition of  $R_{\hat{F}}$ . From the chain-formula properties, we know that there are  $p_i$  witnesses of  $\varphi_{p_i, m_i}$  and  $q_i - p_i$  witnesses of  $\varphi_{q_i - p_i, m_i}$ . Since the representative formulas of every weighted variable use a fresh set of variables, and since there is no assignment that can make both a variable and its negation to become true, we have from the structure of  $\hat{F}$  that if  $\sigma$  is a witness of  $F$ , then  $|S_\sigma| = \prod_{i \in \sigma^1} p_i \prod_{i \in \sigma^0} (q_i - p_i)$ . Therefore  $|S_\sigma| = W'(\sigma)$ . Note that if  $\sigma$  is not a witness of  $F$ , then there are no compatible satisfying assignments of  $\hat{F}$ ; hence  $S_\sigma = \emptyset$  in this case. Overall, this gives

$$|R_{\hat{F}}| = \sum_{\sigma \in R_F} |S_\sigma| + \sum_{\sigma \notin R_F} |S_\sigma| = \sum_{\sigma \in R_F} |S_\sigma| + 0 = W'(F).$$

It follows that  $W(F) = \frac{W'(F)}{C_W} = \frac{|R_{\hat{F}}|}{C_W}$ .  $\square$

We note that the number  $m_i$  is picked, only so the truth table of  $\varphi_{p_i, m_i}$  can store  $p_i$  assignments, and that the truth table of  $\varphi_{q_i - p_i, m_i}$  can store  $q_i - p_i$  assignments.

### A.2 Proof for Theorem 1

**Theorem.** The return value of  $\mathcal{A}(F, \varepsilon, \delta)$  is an  $(\varepsilon, \delta)$  estimate of  $W(F)$ . Furthermore,  $\mathcal{A}$  makes  $\mathcal{O}\left(\frac{\log(n + \sum_i m_i) \log(1/\delta)}{\varepsilon^2}\right)$  calls to an NP oracle, where  $m_i = \lceil \max(\log_2 p_i, \log_2(q_i - p_i)) \rceil$ .

*Proof.* Denote the return value that the approximated model counter  $\mathcal{B}$  returns by  $v$ . Then we have that  $\Pr\left[\frac{|R_{\hat{F}}|}{1+\varepsilon} \leq v \leq (1+\varepsilon)|R_{\hat{F}}|\right] \geq 1 - \delta$ . By dividing the returned value  $v$  by the factor  $C_W$  we then have that  $\Pr\left[\frac{|R_{\hat{F}}|}{C_W(1+\varepsilon)} \leq \frac{v}{C_W} \leq (1+\varepsilon)\frac{|R_{\hat{F}}|}{C_W}\right] \geq 1 - \delta$ . Recall that from Lemma 1 we have that  $W(F) = \frac{|R_{\hat{F}}|}{C_W}$ . Then since  $\mathcal{A}(F, \varepsilon, \delta)$  returns  $v' = v/C_W$ , we all in all have that  $\Pr\left[\frac{W(F)}{1+\varepsilon} \leq v' \leq (1+\varepsilon)W(F)\right] \geq 1 - \delta$ . That is, the return value  $\mathcal{A}(F, \varepsilon, \delta)$  is an  $(\varepsilon, \delta)$  estimate of  $W(F)$  as required.

The number of NP oracle calls made by Algorithm  $\mathcal{A}$  follows from Theorem 4 of [11], and the fact that  $\hat{F}$  has  $n + \sum_i m_i$  variables ( $n$  from the original formula and  $\sum_i m_i$  added in the chain formulas).  $\square$

### A.3 Handling projected formulation

For the sake of clarity, we presented our techniques without considering projection. However, since the underlying model counter that we use, ApproxMC [10, 11, 43], handles projected model counting, the technical framework described in this paper can be easily extended to the projected formulation.

To see that, note that the formulation of a projected weighted Boolean formula  $F$  is  $(F, P, W)$  where  $P$  is a projected set, and the weight function  $W$  is defined only over the variables of  $P$ . Our algorithm  $\mathcal{A}$  reduces  $(F, P, W)$  using the chain formula reduction of Lemma 1, to a projected unweighted Boolean formula  $(\hat{F}, P \cup Y)$ , where  $Y$  denotes the set of fresh variables used for the chain formulas.  $(\hat{F}, P \cup Y)$  is then fed to ApproxMC that supports projected model counting. The result value  $v$  that ApproxMC returns is an  $(\varepsilon, \delta)$  estimate to  $(\hat{F}, P \cup Y)$ . It follows that  $\mathcal{A}$  returns  $v/C_W$  as an  $(\varepsilon, \delta)$  estimate to  $(F, P, W)$ .

#### A.4 Proof for Theorem 2

As shorthand, in this section we use  $\text{bin}(a)$  to denote the binary representation of  $a$  and  $|\text{bin}(a)|$  to denote the number of bits that are needed to describe  $a$  (i.e.,  $\lceil \log_2(a) \rceil$ ).

**Theorem.** *Algorithm 1 with initial arguments  $(p, q)$ ,  $(a_1, b_1) = (0, 1)$  and  $(a_2, b_2) = (1, 1)$  finds a nearest  $m$ -bit fraction to  $p/q$ .*

*Proof.* First note that since the required  $p$  and  $q - p$  are of size  $m$  bits at most, the denominator of a potential nearest  $m$ -bits fraction is no bigger than  $k = 2^m - 2$ . Therefore, the required  $p/q$  is contained in the Farey Sequence  $\mathcal{F}_k$ , that is the sequence of all irreducible fractions (in increasing order) with denominator of at most size  $k$ .

A way to construct the entire Farey sequence  $\mathcal{F}_i$  from  $\mathcal{F}_{i-1}$  is as follows: Initially set  $\mathcal{F}_i = \mathcal{F}_{i-1}$ . Then iteratively go over the members of  $\mathcal{F}_i$  in an increasing order, and for every  $a_1/b_1 < a_2/b_2$  neighbors in  $\mathcal{F}_{i-1}$ , construct  $(a_1 + a_2)/(b_1 + b_2)$ . It turns out that  $(a_1 + a_2)/(b_1 + b_2)$  is an irreducible fraction and that  $a_1/b_1 < (a_1 + a_2)/(b_1 + b_2) < a_2/b_2$ . Now, if  $b_1 + b_2 = i$ , add  $(a_1 + a_2)/(b_1 + b_2)$  to  $\mathcal{F}_i$ , otherwise skip. Finally arrange  $\mathcal{F}_i$  in an increasing order. The initial sequence is  $\mathcal{F}_1 = (0/1, 1/1)$ . Then for example  $\mathcal{F}_2 = (0/1, 1/2, 1/1)$ ,  $\mathcal{F}_3 = (0/1, 1/3, 1/2, 2/3, 1/1)$  and so on.

The algorithm ApproxFraction follows the Farey sequence construction by setting at every call  $a = a_1 + a_2$ ,  $b = b_1 + b_2$ , and evaluating  $a/b$ . Assume that both  $|\text{bin}(a)|$  and  $|\text{bin}(b - a)|$  are at most than  $m$ . Then  $a/b$  is a candidate for the nearest  $m$ -bit fraction to  $p/q$ , where Lines 7-10 check whether  $|a/b - p/q| < |a_1/b_1 - p/q|$  or  $|a/b - p/q| < |a_2/b_2 - p/q|$ , and makes the recursive call replacing either  $a_1/b_1$  with either  $a/b$  if  $a/b$  is  $m$ -bit nearer from the bottom or either replacing  $a_2/b_2$  with  $a/b$  if  $a/b$  is  $m$ -bit nearer from the top.

Algorithm ApproxFraction bounds to stop as the denominator always increases (i.e.  $b_1 + b_2 > b_1$  and  $b_1 + b_2 > b_2$ ). It is left to see that when the algorithm stops, the value of  $\min\{(a_1, b_1), (a_2, b_2)\}$  is the  $m$ -nearest fraction to  $p/q$ . First, if either  $a_1/b_1$ ,  $a_2/b_2$  or  $a/b$  is equal to  $p/q$ , then the algorithm returns  $p/q$  in Line 4 which is obviously the  $m$ -bits nearest fraction. Next, assume that either  $|\text{bin}(a)|$  or  $|\text{bin}(b - a)|$  are bigger than  $m$  as the stopping condition in Line 5 indicates. consider the interval  $(a_1/b_1, a_2/b_2)$ . Since the nearest  $m$ -bits fractions are members of  $\mathcal{F}_k$ , these must be found via the Farey sequence construction above. Since for every  $i$ , only consecutive fractions of  $\mathcal{F}_i$  are used to generate members of  $\mathcal{F}_{i-1}$ , it follows that the nearest  $n$ -bits fraction must be generated, as in the Farey sequence construction, by using only fractions from the interval  $(a_1/b_1, a_2/b_2)$ . We show by induction that for every  $i$ , there are no  $m$ -bit fractions in  $\mathcal{F}_i \cap (a_1/b_1, a_2/b_2)$ . First set  $\mathcal{F}_j$  to be the Farey sequence for which both  $a_1/b_1, a_2/b_2 \in \mathcal{F}_j \setminus \mathcal{F}_{j-1}$ . Then  $a_1/b_1, a_2/b_2$  are consecutive in  $\mathcal{F}_j$ , therefore  $\mathcal{F}_j \cap (a_1/b_1, a_2/b_2)$  is empty. Assume by induction that for every  $i \geq j$ ,  $\mathcal{F}_i \cap (a_1/b_1, a_2/b_2)$  does not contain  $m$ -bits fraction. Now, observe that  $\mathcal{F}_{i+1} \cap (a_1/b_1, a_2/b_2)$  is generated from consecutive fractions in  $\mathcal{F}_i \cap [a_1/b_1, a_2/b_2]$ . This can be done only if the two fractions are  $a_1/b_1, a_2/b_2$ , and then we had that the fraction  $a/b = (a_1 + a_2)/(b_1 + b_2)$  is not an  $m$ -bit fraction, or otherwise at least one of the fractions belongs to  $\mathcal{F}_i \cap (a_1/b_1, a_2/b_2)$ , hence is not an  $m$ -bits fraction. The following lemma shows that in this case as well, the result is not an  $m$ -bit fraction, hence all in all  $\mathcal{F}_{i+1} \cap (a_1/b_1, a_2/b_2)$  is empty as well. As such, the nearest  $m$ -bits fractions from bottom and top are  $(a_1/b_1)$  and  $(a_2/b_2)$  respectively and algorithm returns  $\min\{(a_1/b_1), (a_2/b_2)\}$ , which is the nearest  $m$ -bits fraction as required.  $\square$

**Lemma 2.** *Let  $a/b, x/y$  be a fraction where  $0 < a < b, 0 < x < y$  and either  $|\text{bin}(a)|$  or  $|\text{bin}(b - a)|$  are bigger than  $n$ . Consider the fraction  $(a + x)/(b + y)$ . Then either  $|\text{bin}(a + x)| > m$  or  $|\text{bin}((b + y) - (a + x))| > m$ .*

*Proof.* Obviously for every two numbers  $i, j$ ,  $i < j \iff \text{bin}(i) < \text{bin}(j) \iff |\text{bin}(i)| < |\text{bin}(j)|$ . Assume  $|\text{bin}(a)| > m$ . Then since  $x$  is positive then  $(a + x) > a$ . Thus  $|\text{bin}(a + x)| > m$ . Next, assume  $|\text{bin}(b - a)| > m$ . Then since  $y - x > 0$  then  $(b + y) - (a + x) = (b - a) + (y - x) > (b - a)$ , so  $|\text{bin}((b + y) - (a + x))| > m$ .  $\square$

Finally from the analysis above of the stopping conditions of *ApproxFraction*, we have that the maximal running time of *ApproxFraction* is  $2^{2^m} - 2$ . The following example shows that this can also be a worst case. Consider any input  $1/q$  where  $q > 2^m$  and  $m$  is the number of the required bits. In such case at every step we have that  $a_1/b_1 = 0/1$ , and so  $a/b = a_2/b_2 + 1$ . This gives an overall running time of  $2^{2^m} - 2$ .
